# Supplementary material for: IL-33 induces thymic involution-associated naive T cell aging and impairs host control of severe infection
Source: PubMed Central journal article supplement (PMC9653498; doi:10.1038/s41467-022-34660-4), 2022-11-12
Supplement: 41467_2022_34660_MOESM1_ESM.pdf [file 41467_2022_34660_MOESM1_ESM.pdf]

1 **Supplementary Information**

2 **Supplementary Figures 1-7 and Legends**

3

4 **IL-33 induces thymic involution-associated naive T cell aging and impairs host control of**  
5 **severe infection**

6

7 Lei Xu <sup>1, 2, 3, 4, 5, 6, #</sup>, Chuan Wei <sup>1, 2, 3, 4, #</sup>, Ying Chen <sup>1, 2, 3, 4</sup>, Yue Wu <sup>1, 2, 3, 4</sup>, Xiaoli Shou <sup>1, 2, 3, 4</sup>,  
8 Wenjie Chen <sup>1, 2, 3, 4</sup>, Di Lu <sup>1, 2, 3, 4</sup>, Haoran Sun <sup>1, 2, 3, 4</sup>, Wei Li <sup>6</sup>, Beibei Yu <sup>1, 2, 3, 4</sup>, Xiaowei Wang  
9 <sup>7</sup>, Xiaojun Zhang <sup>8</sup>, Yanxiong Yu <sup>1, 2, 3, 4</sup>, Zhigang Lei <sup>1, 2, 3, 4</sup>, Rui Tang <sup>1, 2, 3, 4</sup>, Jifeng Zhu <sup>1, 2, 3, 4</sup>,  
10 Yalin Li <sup>1, 2, 3, 4</sup>, Linrong Lu <sup>9</sup>, Hong Zhou <sup>10</sup>, Sha Zhou <sup>1, 2, 3, 4, \*</sup>, Chuan Su <sup>1, 2, 3, 4, \*</sup>, Xiaojun  
11 Chen <sup>1, 2, 3, 4, \*</sup>

12

13 <sup>1</sup>Jiangsu Key Laboratory of Pathogen Biology, Nanjing Medical University, Nanjing, Jiangsu  
14 211166, P. R. China.

15 <sup>2</sup>State Key Lab of Reproductive Medicine, Nanjing Medical University, Nanjing, Jiangsu  
16 211166, P. R. China.

17 <sup>3</sup>Department of Pathogen Biology and Immunology, Nanjing Medical University, Nanjing,  
18 Jiangsu 211166, P. R. China.

19 <sup>4</sup>Center for Global Health, Nanjing Medical University, Nanjing, Jiangsu 211166, P. R.  
20 China.

21 <sup>5</sup>Department of Respiratory, Nanjing First Hospital, Nanjing Medical University, Nanjing,  
22 Jiangsu 210006, P. R. China.

23 <sup>6</sup>Department of Clinical Laboratory, Nanjing First Hospital, Nanjing Medical University,  
24 Nanjing, Jiangsu 210006, P. R. China.

25 <sup>7</sup>Department of Blood Transfusion, Children's Hospital of Nanjing Medical University,  
26 Nanjing, Jiangsu 210008, P. R. China.

27 <sup>8</sup>Imaging Center, Children's Hospital of Nanjing Medical University, Nanjing, Jiangsu  
28 210008, P. R. China.

29 <sup>9</sup>Institute of Immunology, School of Medicine, Zhejiang University, Hangzhou 310058, P. R.  
30 China.

1 <sup>10</sup>Department of Cell Biology, School of Life Sciences, Anhui Medical University, Hefei  
2 230032, P. R. China.

3

4 #These individuals contributed equally.

5 \*Correspondence and requests for materials should be addressed to X.C. (email:  
6 chenxiaojun@njmu.edu.cn), C.S. (email: chuansu@njmu.edu.cn), or S.Z. (shazhou@  
7 njmu.edu.cn).

8

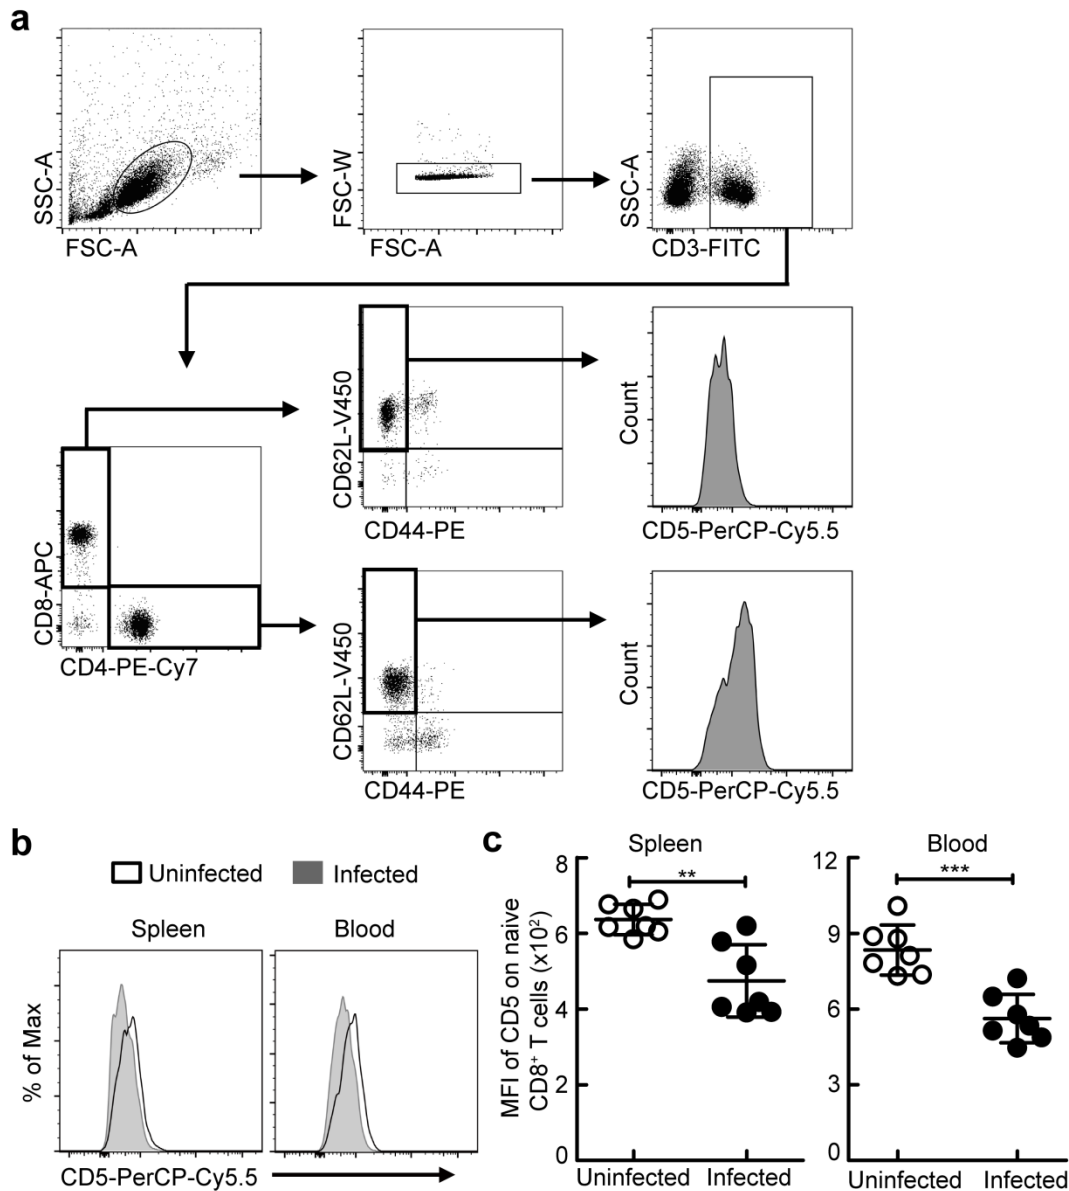

1  
2 **Fig. S1. Schistosome infection decreases the expression of CD5 in naïve CD8<sup>+</sup> T cells.** (a)  
3 Gating strategy of CD5 expression on naïve CD4<sup>+</sup> T cells or naïve CD8<sup>+</sup> T cells; (b, c)  
4 Samples were obtained from uninfected mice or mice 8 weeks after schistosome infection.  
5 Representative and quantified flow cytometry of CD5 MFI on naïve CD8<sup>+</sup> T cells from the  
6 spleen or peripheral blood (n = 7 mice, pool of two independent experiments). P = 0.0014  
7 (Spleen), P = 0.0002 (Blood), Unpaired two-tailed Student's t-test. All data are shown as the  
8 mean ± s.d. \*\*P < 0.01, \*\*\*P < 0.001. Source data are provided as a Source Data file.

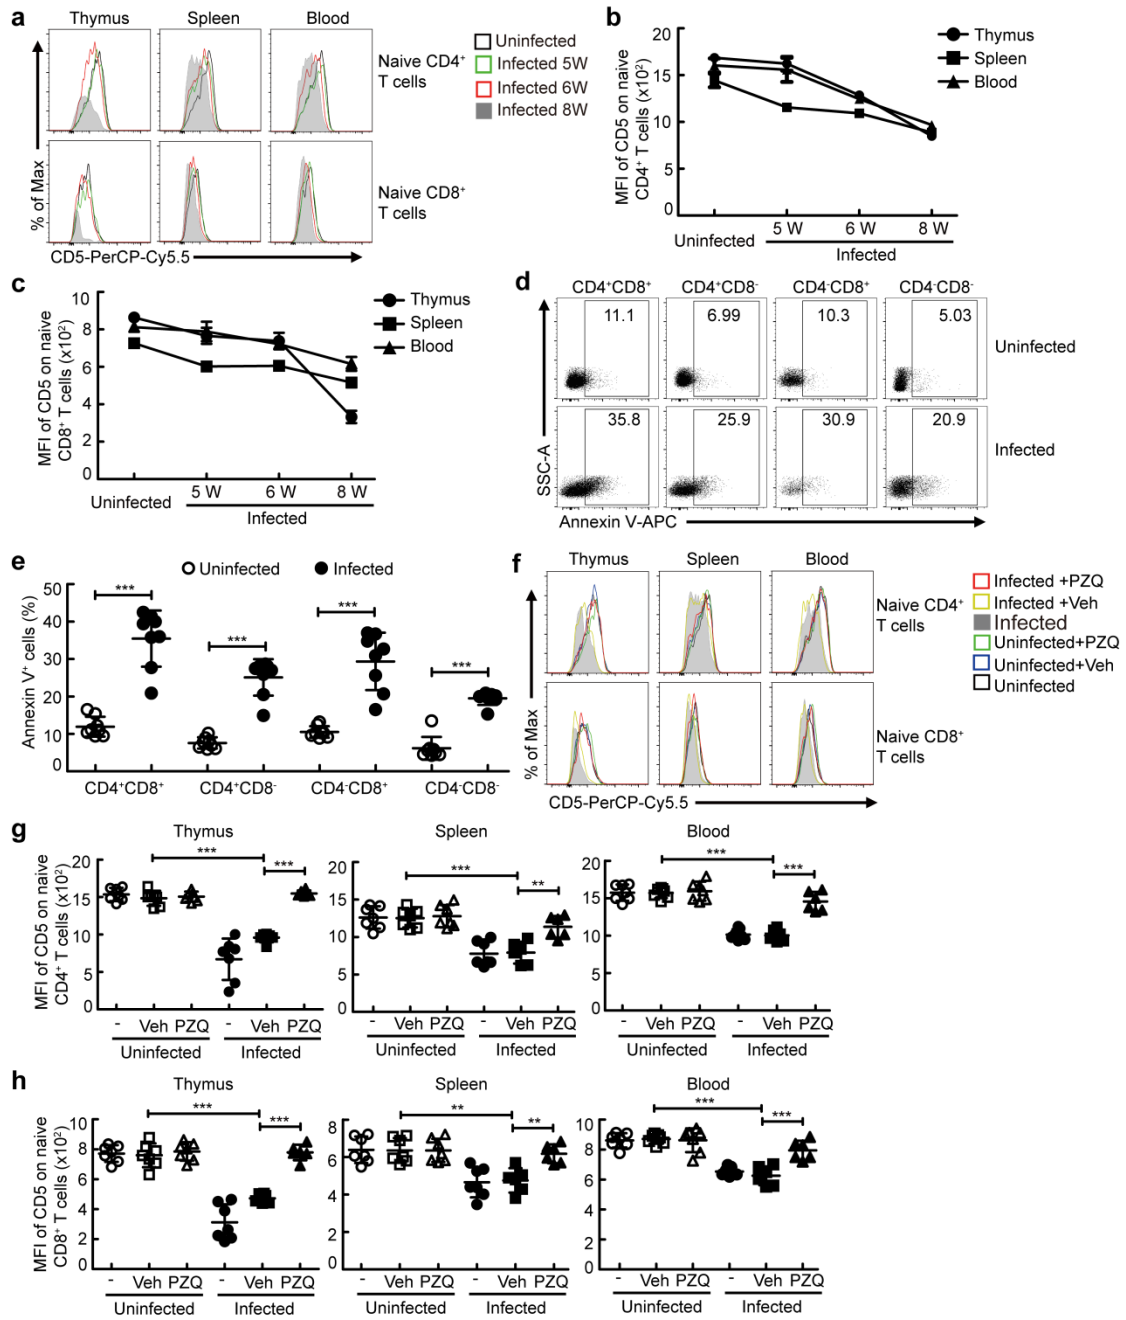

1

2 **Fig. S2. T cell aging is linked to thymic involution during schistosome infection.** (a-c)

3 Cells were from uninfected mice or mice 5, 6, or 8 weeks after schistosome infection.

4 Representative and quantified flow cytometry of CD5 MFI on naïve CD4<sup>+</sup> T cells or naïve

5 CD8<sup>+</sup> T cells from the thymus, spleen, or peripheral blood (Infected 8 W, n = 3 mice; other

6 groups, n = 4 mice). (d, e) Samples were obtained from uninfected mice or mice 8 weeks after

7 schistosome infection. Representative and quantified flow cytometry of annexin V<sup>+</sup> cells

8 gated on CD4<sup>+</sup>CD8<sup>+</sup>DP, CD4SP, CD8SP, or CD4<sup>-</sup>CD8<sup>-</sup> DN thymocytes in the thymus (n = 8

9 mice, pool of two independent experiments). P < 0.0001 for all thymocyte subsets, One-way

1 ANOVA with Tukey's multiple comparisons. **(f-h)** Mice were treated with PZQ at week 8  
2 after infection and sacrificed 7 weeks after PZQ treatment. Representative and quantified flow  
3 cytometry of CD5 MFI on naïve CD4<sup>+</sup> T cells or naïve CD8<sup>+</sup> T cells from the thymus, spleen,  
4 or peripheral blood (Infected+Veh or Infected+PZQ, n = 6 mice; other groups, n = 7 mice;  
5 pool of two independent experiments). CD4<sup>+</sup> T cells: Infected+Veh versus Uninfected+Veh, P  
6 < 0.0001 (Thymus), P < 0.0001 (Spleen), P < 0.0001 (Blood); Infected+PZQ versus  
7 Infected+Veh, P < 0.0001 (Thymus), P = 0.0035 (Spleen), P < 0.0001 (Blood). CD8<sup>+</sup> T cells:  
8 Infected+Veh versus Uninfected+Veh, P < 0.0001 (Thymus), P = 0.0017 (Spleen), P < 0.0001  
9 (Blood); Infected+PZQ versus Infected+Veh, P < 0.0001 (Thymus), P = 0.0094 (Spleen), P <  
10 0.0001 (Blood). One-way ANOVA with Tukey's multiple comparisons. All data are shown as  
11 the mean ± s.d; \*P < 0.05, \*\*P < 0.01, \*\*\*P < 0.001. Source data are provided as a Source  
12 Data file.

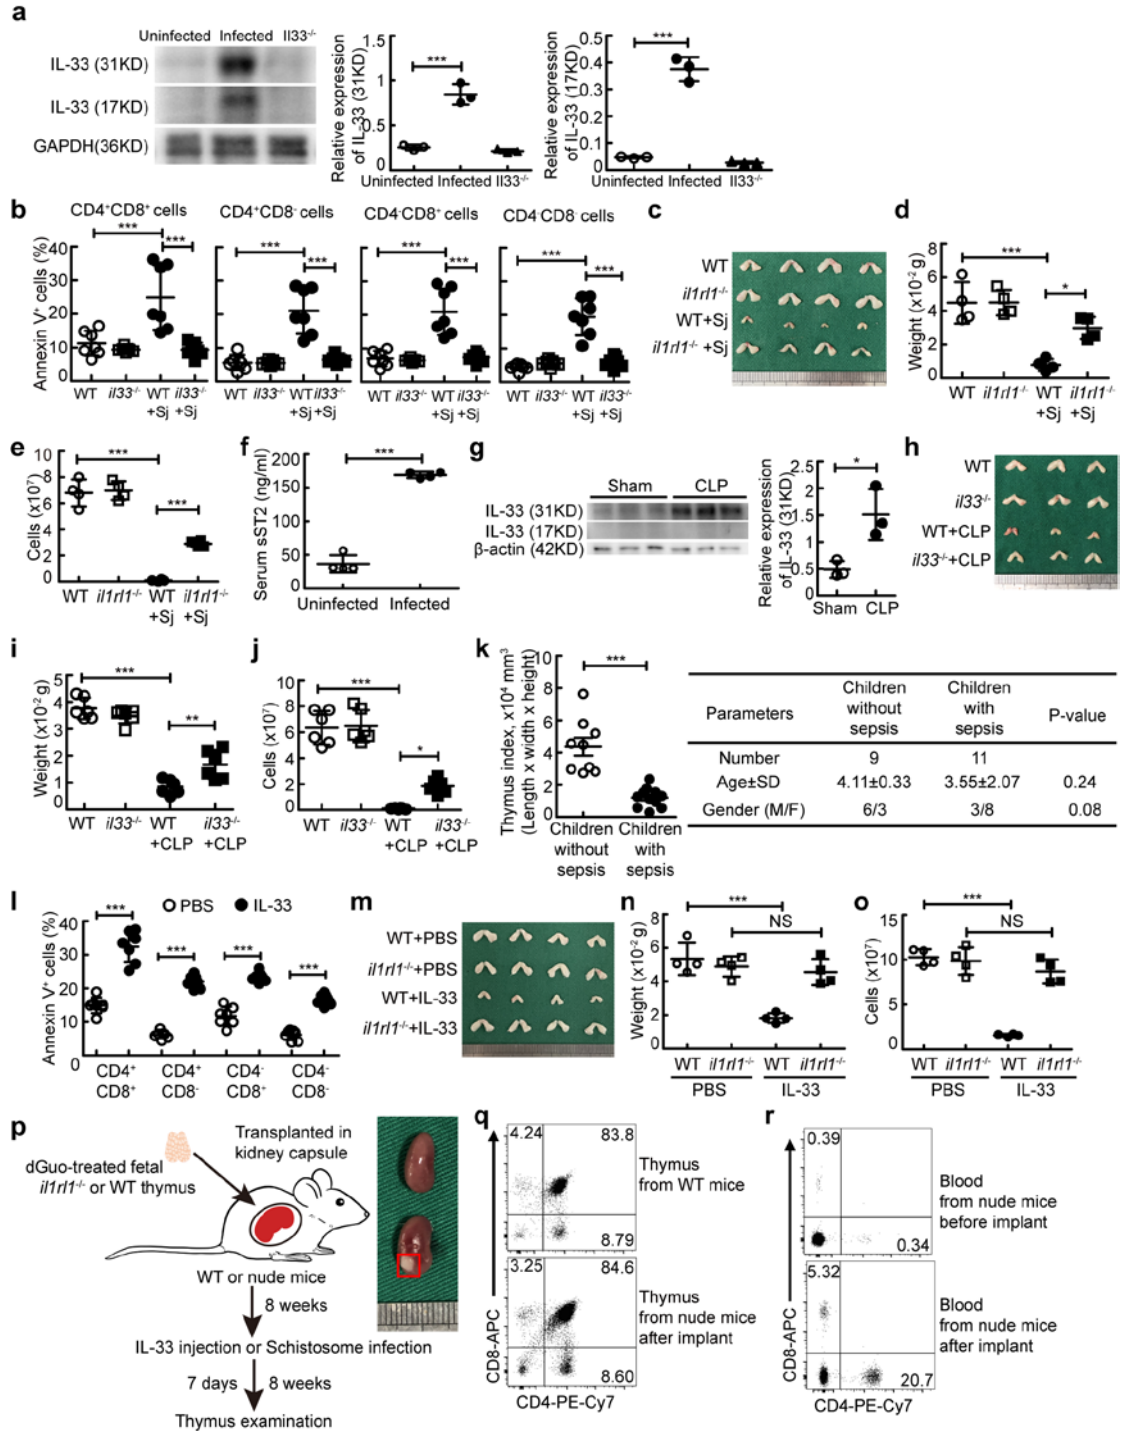

1

2 **Fig. S3. IL-33 leads to thymic involution during severe infection.** (a) Western blots of  
 3 IL-33 in the liver after schistosomiasis (n = 3 mice). P = 0.0001 (31KD), P < 0.0001  
 4 (17KD). (b) Annexin V<sup>+</sup> cells in thymocytes after schistosomiasis (n = 7 mice, pool of  
 5 two independent experiments). WT+Sj versus WT, P < 0.0001 for all subsets; *iI33*<sup>-/-</sup>+Sj versus  
 6 WT+Sj, P < 0.0001 for all subsets. (c-e) Morphology, weight and cellularity of thymus from  
 7 schistosomiasis-infected mice (n = 4 mice). WT+Sj versus WT, P = 0.0002 (weight), P < 0.0001

1 (cells); *il33*<sup>-/-</sup>+Sj versus WT+Sj, P = 0.0115 (weight), P = 0.0002 (cells). **(f)** The level of sST2  
2 was determined by ELISA (n = 4 mice), P < 0.0001. **(g)** Western blots of IL-33 in the thymus  
3 after CLP induction (n = 3 mice), P = 0.0204. **(h-j)** Morphology, weight, and cellularity of  
4 thymus after CLP induction (n = 6 mice, pool of two independent experiments). WT+CLP  
5 versus WT, P < 0.0001 (weight or cells); *il33*<sup>-/-</sup>+CLP versus WT+CLP, P = 0.0069 (weight), P  
6 = 0.0213 (cells). **(k)** Relative thymus size (n = 9 patients for children without sepsis, n = 11  
7 patients for children with sepsis), P < 0.0001. **(l)** Annexin V<sup>+</sup> cells in thymocytes after IL-33  
8 treatment (n = 7 mice, pool of two independent experiments). P < 0.0001 for all thymocyte  
9 subsets. **(m-o)** Morphology, weight, and cellularity of thymus after IL-33 treatment (n = 4  
10 mice). WT+IL-33 versus WT+PBS, P < 0.0001 (weight or cells); *il33*<sup>-/-</sup>+IL-33 versus  
11 *il33*<sup>-/-</sup>+PBS, P = 0.9063 (weight), P = 0.4730 (cells). **(p)** Morphology of the thymus in the  
12 kidney capsule after thymus transplantation. **(q)** Representative flow cytometry of thymocytes  
13 after thymus transplantation. **(r)** Representative flow cytometry of T cells in peripheral blood  
14 after thymus transplantation. **(a, b, d, e, i, j, l, n, o)** One-way ANOVA with Tukey's multiple  
15 comparisons. **(f, g, k)** Unpaired two-tailed Student's t-test. All data are shown as the mean ±  
16 s.d. \*P < 0.05, \*\*P < 0.01, \*\*\*P < 0.001, NS, not significant. Source data are provided as a  
17 Source Data file.

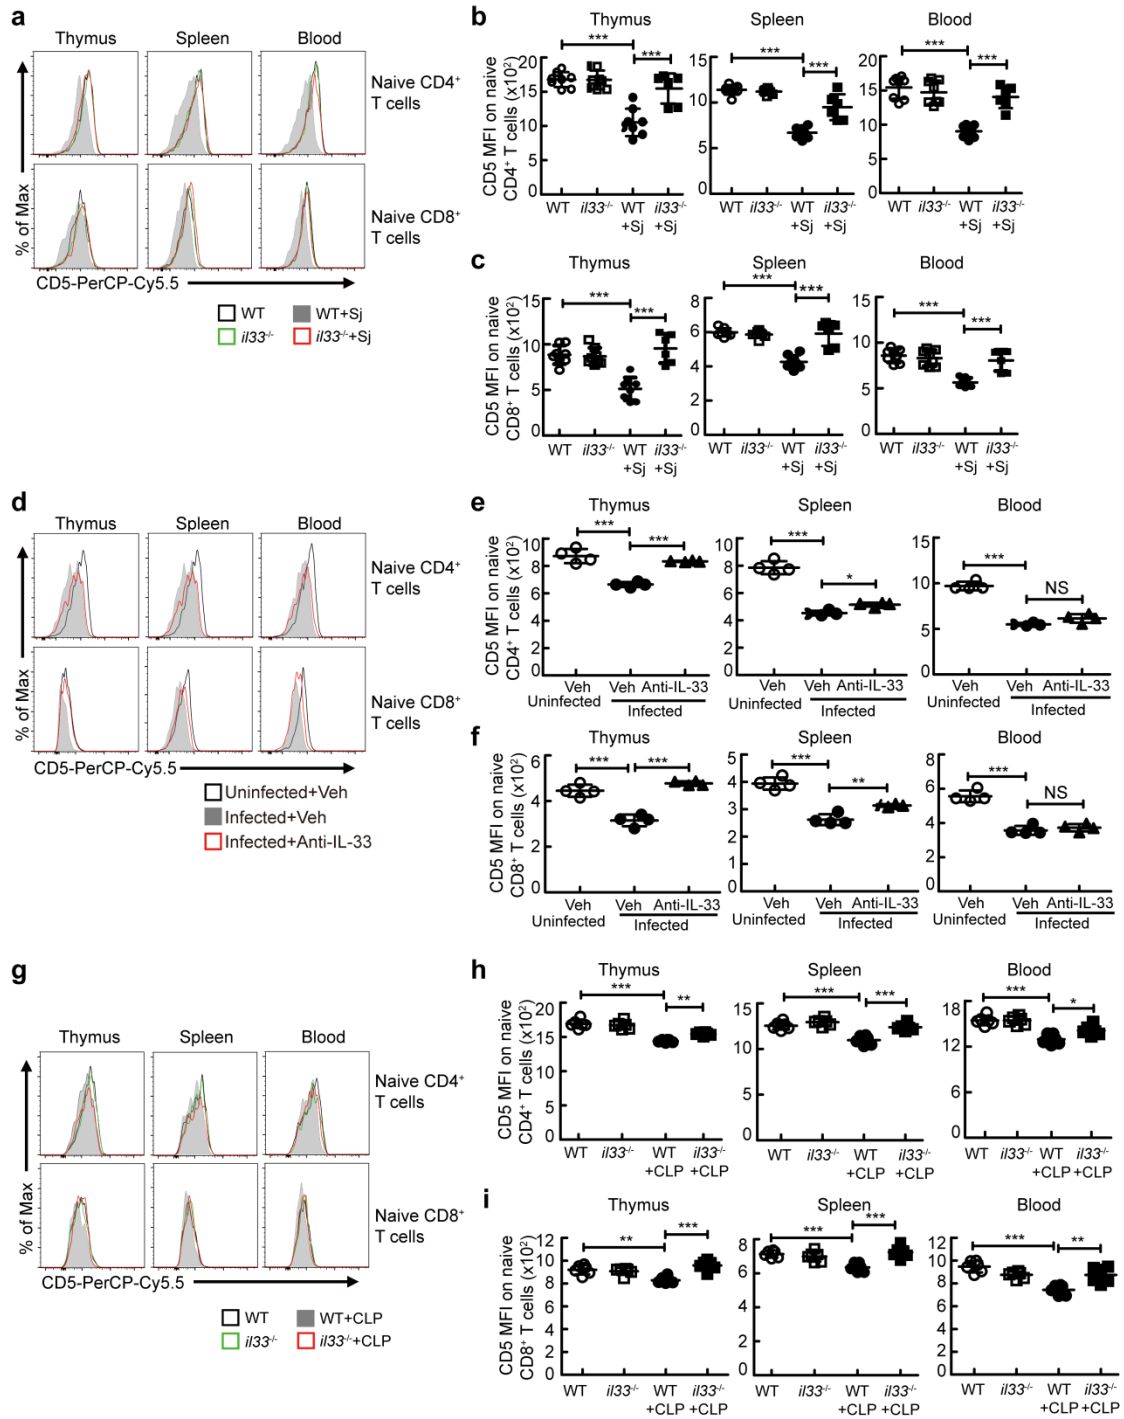

1

2 **Fig. S4. Loss of IL-33-mediated thymic involution reverses T-cell immunity during**

3 **severe infection.** (a-c) Samples were from uninfected or schistosome-infected WT or *il33*<sup>-/-</sup>

4 mice. CD5 MFI on naive CD4<sup>+</sup> T cells or naive CD8<sup>+</sup> T cells from the thymus, spleen, or

5 peripheral blood (*il33*<sup>-/-</sup>+Sj, n = 6 mice, other groups, n = 8 mice, pool of two independent

6 experiments). CD4<sup>+</sup> T cells: WT+Sj versus WT, P < 0.0001 (Thymus, Spleen, or Blood);

7 *il33*<sup>-/-</sup>+Sj versus WT+Sj, P < 0.0001 (Thymus, Spleen, or Blood). CD8<sup>+</sup> T cells: WT+Sj versus



1 WT,  $P < 0.0001$  (Thymus, Spleen, or Blood);  $il33^{-/-}$ +Sj versus WT+Sj,  $P < 0.0001$  (Thymus,  
2 Spleen, or Blood). One-way ANOVA with Tukey's multiple comparisons. **(d-f)** Samples were  
3 from uninfected or schistosome-infected mice treated with anti-IL-33. CD5 MFI on naive  
4  $CD4^{+}$  T or naive  $CD8^{+}$  T cells from the thymus, spleen, or peripheral blood ( $n = 4$  mice).  
5  $CD4^{+}$  T cells: Infected+Veh versus Uninfected+Veh,  $P < 0.0001$  (Thymus, Spleen, or Blood);  
6 Infected+anti-IL-33 versus Infected+Veh,  $P < 0.0001$  (Thymus),  $P = 0.0439$  (Spleen),  $P =$   
7  $0.0899$  (Blood).  $CD8^{+}$  T cells: Infected+Veh versus Uninfected+Veh,  $P < 0.0001$  (Thymus,  
8 Spleen, or Blood); Infected+anti-IL-33 versus Infected+Veh,  $P < 0.0001$  (Thymus),  $P =$   
9  $0.00559$  (Spleen),  $P = 0.7075$  (Blood). One-way ANOVA with Tukey's multiple comparisons.  
10 **(g-i)** Samples were from WT or  $il33^{-/-}$  mice and WT or  $il33^{-/-}$  mice after CLP induction. CD5  
11 MFI on naive  $CD4^{+}$  T or naive  $CD8^{+}$  T cells from the thymus, spleen, or peripheral blood ( $n =$   
12  $6$  mice, pool of two independent experiments).  $CD4^{+}$  T cells: WT+CLP versus WT,  $P < 0.0001$   
13 (Thymus, Spleen, or Blood);  $il33^{-/-}$ +CLP versus WT+CLP,  $P = 0.0034$  (Thymus),  $P < 0.0001$   
14 (Spleen),  $P = 0.0175$  (Blood).  $CD8^{+}$  T cells: WT+CLP versus WT,  $P = 0.0018$  (Thymus),  $P =$   
15  $0.0007$  (Spleen),  $P < 0.0001$  (Blood);  $il33^{-/-}$ +CLP versus WT+CLP,  $P < 0.0001$  (Thymus),  $P =$   
16  $0.0002$  (Spleen),  $P = 0.0012$  (Blood). One-way ANOVA with Tukey's multiple comparisons.  
17 Data are shown as the mean  $\pm$  s.d. \* $P < 0.05$ , \*\* $P < 0.01$ , \*\*\* $P < 0.001$ , NS, not significant.  
18 Source data are provided as a Source Data file.

19

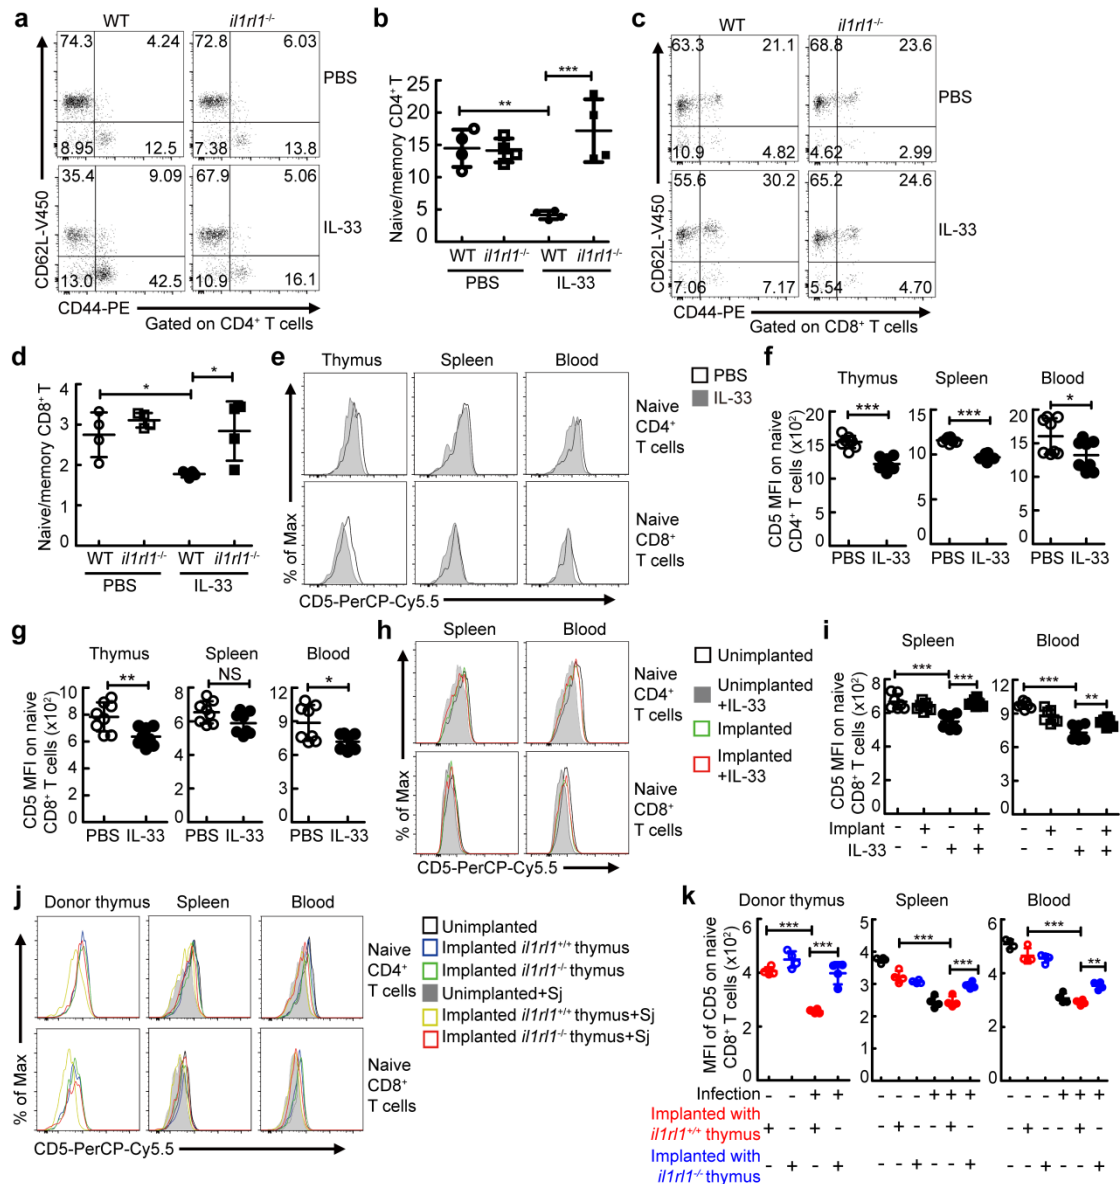

1

2 **Fig. S5. IL-33 results in thymic involution-mediated T cell aging.** (a-d) Naive/memory  
 3 naïve CD4<sup>+</sup> T cells or CD8<sup>+</sup> T cells in the spleen from WT or *il1r1*<sup>-/-</sup> mice after IL-33  
 4 treatment (n = 4 mice). WT+IL-33 versus WT+PBS, P = 0.0018 (CD4<sup>+</sup> T cells), P = 0.0271  
 5 (CD8<sup>+</sup> T cells); *il1r1*<sup>-/-</sup>+IL-33 versus WT+IL-33, P = 0.0002 (CD4<sup>+</sup> T cells), P = 0.0237  
 6 (CD8<sup>+</sup> T cells). (e-g) Samples were from mice after IL-33 treatment. CD5 MFI on naive CD4<sup>+</sup>  
 7 T cells or CD8<sup>+</sup> T cells from the thymus, spleen, or peripheral blood (n = 8 mice, pool of two  
 8 independent experiments). CD4<sup>+</sup> T cells, P < 0.0001 (Thymus or Spleen), P = 0.0392 (Blood);  
 9 CD8<sup>+</sup> T cells, P = 0.0057 (Thymus), P = 0.0676 (Spleen), P = 0.0162 (Blood); Unpaired  
 10 two-tailed Student's t-test. (h, i) Mice were injected with IL-33 at week 8 after transplantation  
 11 with *il1r1*<sup>-/-</sup> thymus. (h) Representative flow cytometry of CD5 MFI on naive CD4<sup>+</sup> T cells

1 or CD8<sup>+</sup> T cells in the spleen or peripheral blood. **(i)** CD5 MFI on naive CD8<sup>+</sup> T cells in the  
2 spleen or peripheral blood (PBS, n = 7 mice; IL-33, n = 8 mice; pool of two independent  
3 experiments). WT+IL-33 versus WT+PBS, P < 0.0001 (Spleen), P < 0.0001 (Blood);  
4 *il1rl1*<sup>-/-</sup>+IL-33 versus WT+IL-33, P < 0.0001 (Spleen), P = 0.0028 (Blood). **(j, k)** Mice were  
5 infected with schistosome at week 8 after transplantation with *il1rl1*<sup>+/+</sup> or *il1rl1*<sup>-/-</sup> thymus. **(j)**  
6 Representative flow cytometry of CD5 MFI on naive CD4<sup>+</sup> T cells or CD8<sup>+</sup> T cells in donor  
7 thymus, spleen, or peripheral blood. **(k)** CD5 MFI on naive CD8<sup>+</sup> T in donor thymus, spleen,  
8 or peripheral blood (n = 4 mice). Infected+*il1rl1*<sup>+/+</sup> thymus versus Uninfected+*il1rl1*<sup>+/+</sup>  
9 thymus, P < 0.0001 (Donor thymus, Spleen, or Blood); Infected+*il1rl1*<sup>+/+</sup> thymus versus  
10 Infected+*il1rl1*<sup>-/-</sup> thymus, P < 0.0001 (Donor thymus), P = 0.0008 (Spleen), P = 0.0017  
11 (Blood). **(b, d, i, k)** One-way ANOVA with Tukey's multiple comparisons. Data are shown as  
12 the mean ± s.d. \*P < 0.05, \*\*P < 0.01, \*\*\*P < 0.001. Source data are provided as a Source  
13 Data file.

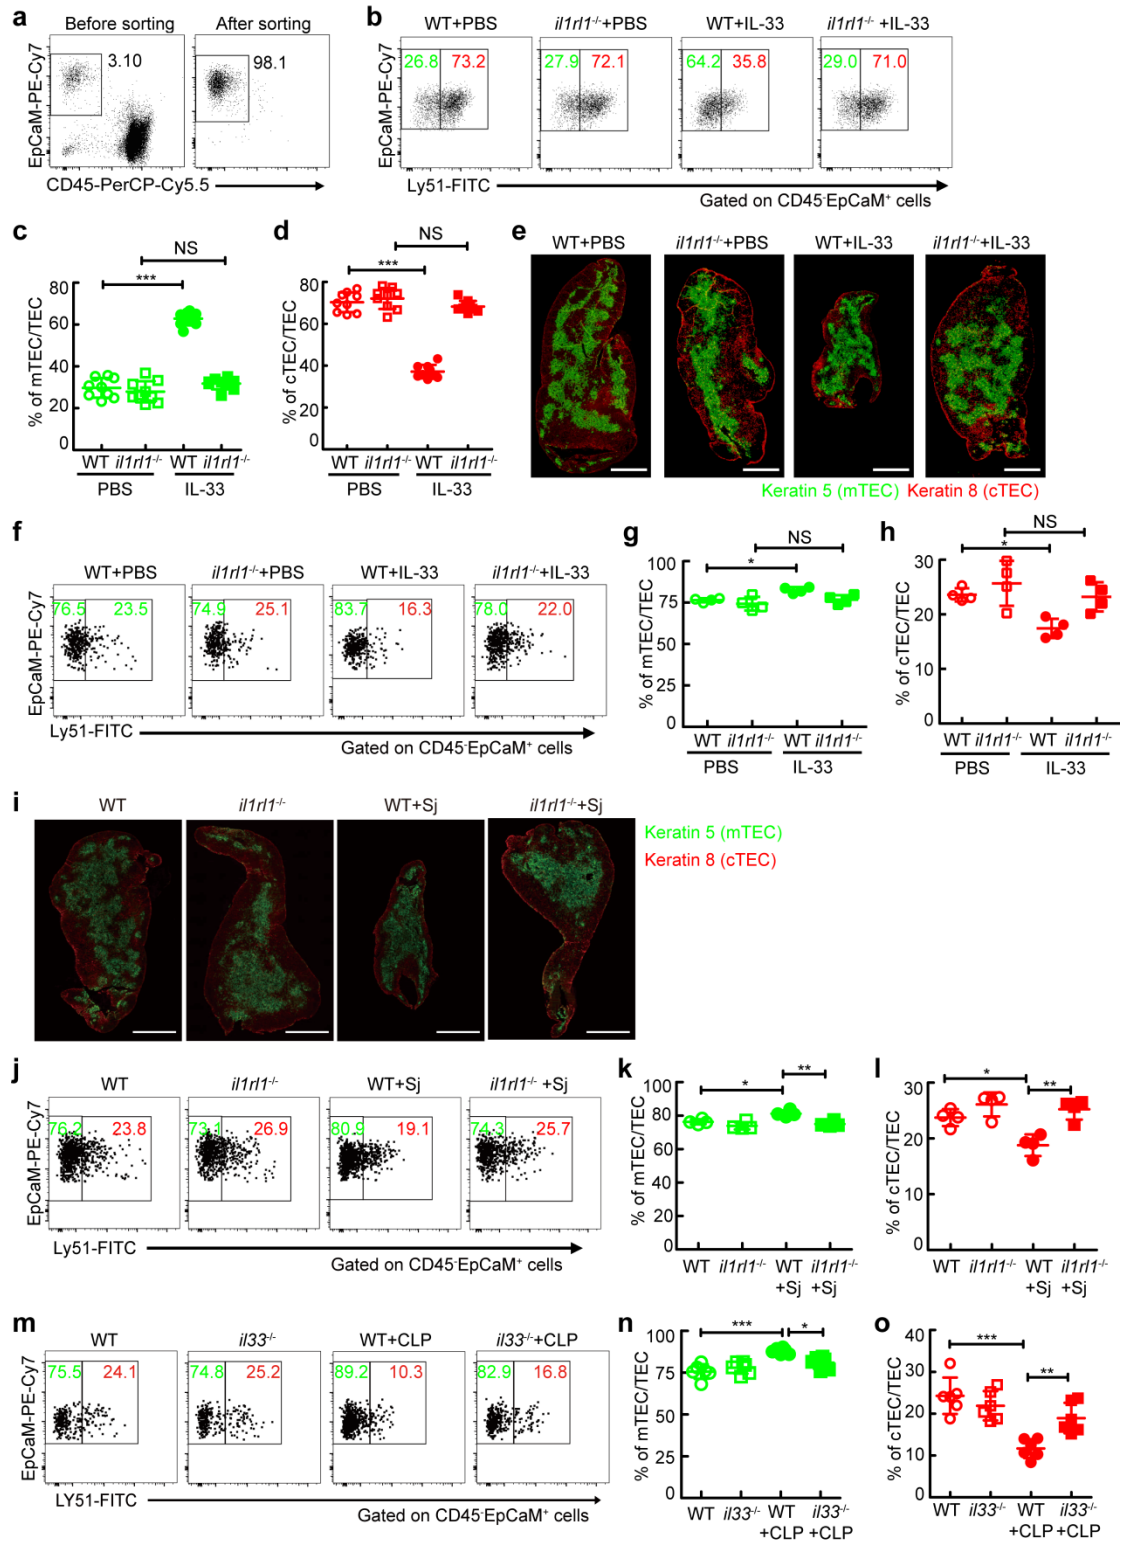

1

2 **Fig. S6. IL-33 perturbs the compartment of TECs.** (a) Representative flow cytometry of

3 TECs before or after being sorted by MACS from the thymus cultured in FTOCs. (b-d)

4 Representative and quantified flow cytometry of mTECs and cTECs in FTOC treated with

1 IL-33 (n = 9 biologically independent samples of fetal thymic lobes, pool of three  
2 independent experiments). WT+IL-33 versus WT+PBS, P < 0.0001 (mTEC or cTEC);  
3 *Il1rl1*<sup>-/-</sup>+IL-33 versus *Il1rl1*<sup>-/-</sup>+PBS, P = 0.2001 (mTEC), P = 0.2018 (cTEC); One-way  
4 ANOVA with Tukey's multiple comparisons. (e) Histology of the thymus from mice after  
5 IL-33 treatment; Green, Keratin 5; red, Keratin 8; Scale bar, 1000 μm. (f-h) Representative  
6 and quantified flow cytometry of cTECs or mTECs in WT or *Il1rl1*<sup>-/-</sup> mice after IL-33  
7 treatment (n = 4 mice). WT+IL-33 versus WT+PBS, P = 0.0314 (mTEC or cTEC);  
8 *Il1rl1*<sup>-/-</sup>+IL-33 versus *Il1rl1*<sup>-/-</sup>+PBS, P = 0.5786 (mTEC or cTEC); One-way ANOVA with  
9 Tukey's multiple comparisons. (i) Histology of the thymus from WT or *Il1rl1*<sup>-/-</sup> mice after  
10 schistosome infection; Green, Keratin 5; red, Keratin 8; Scale bar, 1000 μm. (j-l)  
11 Representative and quantified flow cytometry of cTECs or mTECs in WT or *Il1rl1*<sup>-/-</sup> mice  
12 after schistosome infection (n = 4 mice). WT+Infected versus WT+Uninfected, P = 0.0115  
13 (mTEC), P = 0.0113 (cTEC); *Il1rl1*<sup>-/-</sup>+Infected versus WT+Infected, P = 0.0023 (mTEC), P =  
14 0.0020 (cTEC); One-way ANOVA with Tukey's multiple comparisons. (m-o) Representative  
15 flow cytometry and quantification of flow cytometry of cTECs or mTECs in WT or *Il33*<sup>-/-</sup>  
16 mice after CLP induction (n = 6 mice, pool of two independent experiments). WT+CLP  
17 versus WT, P < 0.0001 (mTEC or cTEC); *Il1rl1*<sup>-/-</sup>+CLP versus WT+CLP, P = 0.0111 (mTEC),  
18 P = 0.0094 (cTEC); One-way ANOVA with Tukey's multiple comparisons. Data are shown as  
19 the mean ± s.d. \*P < 0.05, \*\*P < 0.01, \*\*\*P < 0.001, NS, not significant. Source data are  
20 provided as a Source Data file.

21

22

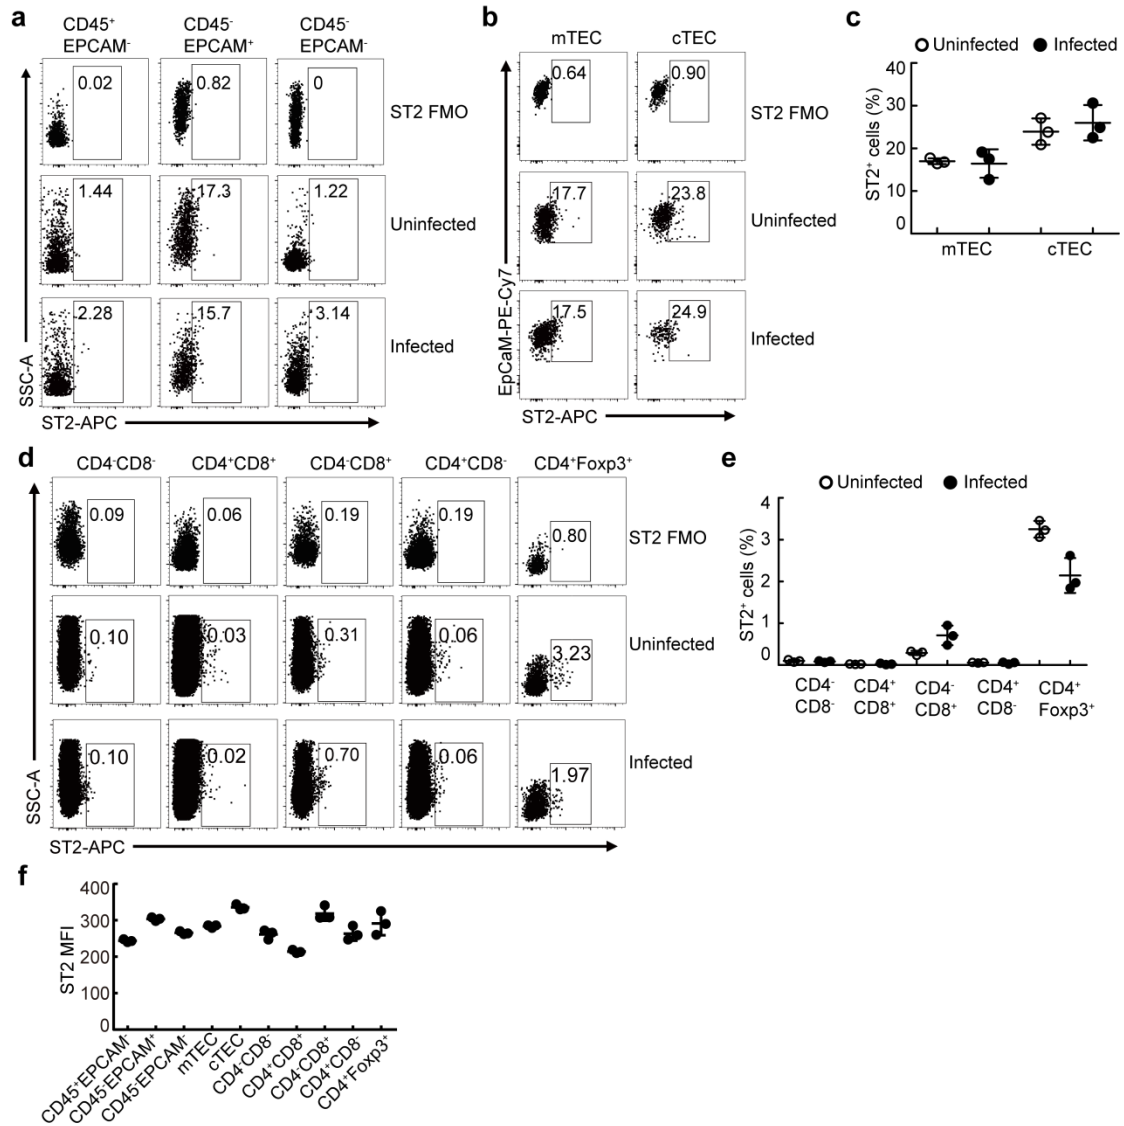

1  
2 **Fig. S7. The expression of ST2 on cells in the thymus.** (a-e) Cells were from the thymus in  
3 uninfected or schistosome-infected mice. (a) Representative flow cytometry of ST2<sup>+</sup> cells  
4 gated on CD45<sup>+</sup>EpCaM<sup>-</sup>, CD45<sup>+</sup>EpCaM<sup>+</sup>, or CD45<sup>+</sup>EpCaM<sup>-</sup> cells. (b, c) Representative and  
5 quantified flow cytometry of ST2<sup>+</sup> cells gated on mTECs or cTECs (n = 3 mice). (d, e)  
6 Representative and quantified flow cytometry of ST2<sup>+</sup> cells gated on CD4<sup>+</sup>CD8<sup>+</sup>DP, CD4SP,  
7 CD8SP, CD4<sup>+</sup>CD8<sup>-</sup> DN, or Treg cells (n = 3 mice). (f) Quantified ST2 MFI of ST2<sup>+</sup> cells gated  
8 on CD45<sup>+</sup>EpCaM<sup>-</sup>, CD45<sup>+</sup>EpCaM<sup>+</sup>, CD45<sup>+</sup>EpCaM<sup>-</sup>, mTECs, cTECs, CD4<sup>+</sup>CD8<sup>+</sup>DP, CD4SP,  
9 CD8SP, CD4<sup>+</sup>CD8<sup>-</sup> DN, or Treg cells in the thymus from schistosome-infected mice (n = 3  
10 mice). Data are shown as the mean ± s.d. Source data are provided as a Source Data file.
